# Supplementary material for: Isopolymolybdate-based inorganic–organic hybrid compounds constructed by multidentate N-donor ligands: syntheses, structures and properties
Source: Royal Society of Chemistry journal article supplement (doi:10.1039/c9dt00119k), 2019-01-01
Supplement: c9dt00119k1.pdf [file c9dt00119k1.pdf]

Supplementary Material (ESI) for Dalton Transactions  
This journal is © The Royal Society of Chemistry

## Isopolymolybdate-based inorganic–organic hybrid compounds constructed by multidentate N-donor ligands: syntheses, structures and properties

Haiyang Guo, Chunhua Gong, Xianghua Zeng, Hao Xu, Qingdao Zeng,\* Junyong Zhang, Ziyi Zhong\* and Jingli Xie\*

Table S1 Selected bond lengths and angles for compounds 1–5.

| Compound 1 |            |           |            |
|------------|------------|-----------|------------|
| Mo1-O3     | 1.717(2)   | Mo1-N3    | 2.302(2)   |
| Mo1-O1     | 1.7379(19) | Mo1-N2    | 2.323(2)   |
| Mo1-O2     | 1.743(2)   | Mo1-N1    | 2.3930(18) |
| O3-Mo1-O1  | 106.63(10) | O2-Mo1-N2 | 85.35(9)   |
| O3-Mo1-O2  | 106.57(10) | N3-Mo1-N2 | 73.06(7)   |
| O1-Mo1-O2  | 106.70(11) | O3-Mo1-N1 | 155.44(9)  |
| O3-Mo1-N3  | 87.60(9)   | O1-Mo1-N1 | 87.44(8)   |
| O1-Mo1-N3  | 89.08(9)   | O2-Mo1-N1 | 87.75(8)   |
| O2-Mo1-N3  | 154.12(8)  | N3-Mo1-N1 | 72.28(7)   |
| O3-Mo1-N2  | 89.23(9)   | N2-Mo1-N1 | 71.79(7)   |
| O1-Mo1-N2  | 155.77(8)  |           |            |

  

| Compound 2 |          |            |          |
|------------|----------|------------|----------|
| Cu1-O1W    | 1.955(4) | Cu1-N3     | 2.071(5) |
| Cu1-N1     | 1.995(5) | Cu1-N4     | 2.070(6) |
| Cu1-N2     | 2.057(5) |            |          |
| O1W-Cu1-N1 | 178.0(2) | N2-Cu1-N4  | 116.9(2) |
| O1W-Cu1-N2 | 97.4(2)  | O1W-Cu1-N3 | 97.1(2)  |
| N1-Cu1-N2  | 81.9(2)  | N1-Cu1-N3  | 81.5(2)  |
| O1W-Cu1-N4 | 100.4(2) | N2-Cu1-N3  | 113.0(2) |
| N1-Cu1-N4  | 81.6(2)  | N4-Cu1-N3  | 123.9(2) |

  

| Compound 3 |          |             |          |
|------------|----------|-------------|----------|
| Co1-O1     | 2.037(5) | Co1-N3      | 2.120(7) |
| Co1-N2     | 2.096(7) | Co1-N1      | 2.198(7) |
| Co1-N4     | 2.115(7) | Co1-O9#2    | 2.217(5) |
| O1-Co1-N2  | 99.4(2)  | N4-Co1-N1   | 76.7(3)  |
| O1-Co1-N4  | 106.4(2) | N3-Co1-N1   | 78.7(3)  |
| N2-Co1-N4  | 149.8(3) | O1-Co1-O9#2 | 82.7(2)  |
| O1-Co1-N3  | 92.9(2)  | N2-Co1-O9#2 | 86.0(2)  |

**Supplementary Material (ESI) for Dalton Transactions**  
**This journal is © The Royal Society of Chemistry**

|           |          |             |          |
|-----------|----------|-------------|----------|
| N2-Co1-N3 | 84.5(3)  | N4-Co1-O9#2 | 82.0(2)  |
| N4-Co1-N3 | 109.2(3) | N3-Co1-O9#2 | 168.8(2) |
| O1-Co1-N1 | 171.7(2) | N1-Co1-O9#2 | 105.5(2) |
| N2-Co1-N1 | 80.1(3)  |             |          |

# 2 -1-x, -y, -z

**Compound 4**

|              |            |              |            |
|--------------|------------|--------------|------------|
| Co1-O1       | 1.978(2)   | Co1-N2       | 2.106(3)   |
| Co1-O12#1    | 2.252(2)   | Co1-N1       | 2.149(3)   |
| Co1-N4       | 2.140(3)   | Co1-N3       | 2.151(3)   |
| O1-Co1-O12#1 | 87.21(9)   | N2-Co1-O12#1 | 171.16(11) |
| O1-Co1-N4    | 101.43(11) | N2-Co1-N4    | 105.24(12) |
| O1-Co1-N2    | 88.46(11)  | N2-Co1-N1    | 80.94(12)  |
| O1-Co1-N1    | 168.67(11) | N2-Co1-N3    | 81.30(12)  |
| O1-Co1-N3    | 103.13(12) | N1-Co1-O12#1 | 103.83(10) |
| N4-Co1-O12#1 | 83.18(10)  | N1-Co1-N3    | 79.30(12)  |
| N4-Co1-N1    | 77.76(12)  | N3-Co1-O12#1 | 92.19(10)  |
| N4-Co1-N3    | 154.74(12) |              |            |

#1 2-x, -y, 1-z

**Compound 5**

|           |            |             |            |
|-----------|------------|-------------|------------|
| Cu1-N4    | 2.004(4)   | Cu1-N5      | 1.967(4)   |
| Cu1-N1    | 2.089(4)   | Cu2-O1      | 2.325(3)   |
| Cu1-N2    | 2.045(4)   | Cu2-N8      | 2.091(4)   |
| Cu1-N3    | 2.119(4)   | Cu2-N9      | 1.990(3)   |
| N5-Cu1-N1 | 100.55(16) | N5-Cu1-N4   | 178.22(15) |
| N5-Cu1-N2 | 97.66(18)  | O1-Cu2-O1#2 | 180.00(16) |
| N5-Cu1-N3 | 98.19(16)  | N8-Cu2-O1   | 89.20(13)  |
| N4-Cu1-N1 | 81.23(15)  | N8-Cu2-N8#2 | 180        |
| N4-Cu1-N2 | 81.55(17)  | N9-Cu2-O1   | 88.01(13)  |
| N4-Cu1-N3 | 80.82(15)  | N9-Cu2-N8#2 | 88.48(14)  |
| N1-Cu1-N3 | 118.73(16) | N9-Cu2-N8   | 91.52(14)  |
| N2-Cu1-N1 | 116.59(17) | N9#2-Cu2-N8 | 88.48(14)  |
| N2-Cu1-N3 | 117.79(16) | N9#2-Cu2-N9 | 180        |

#2 2-x, 1-y, -z

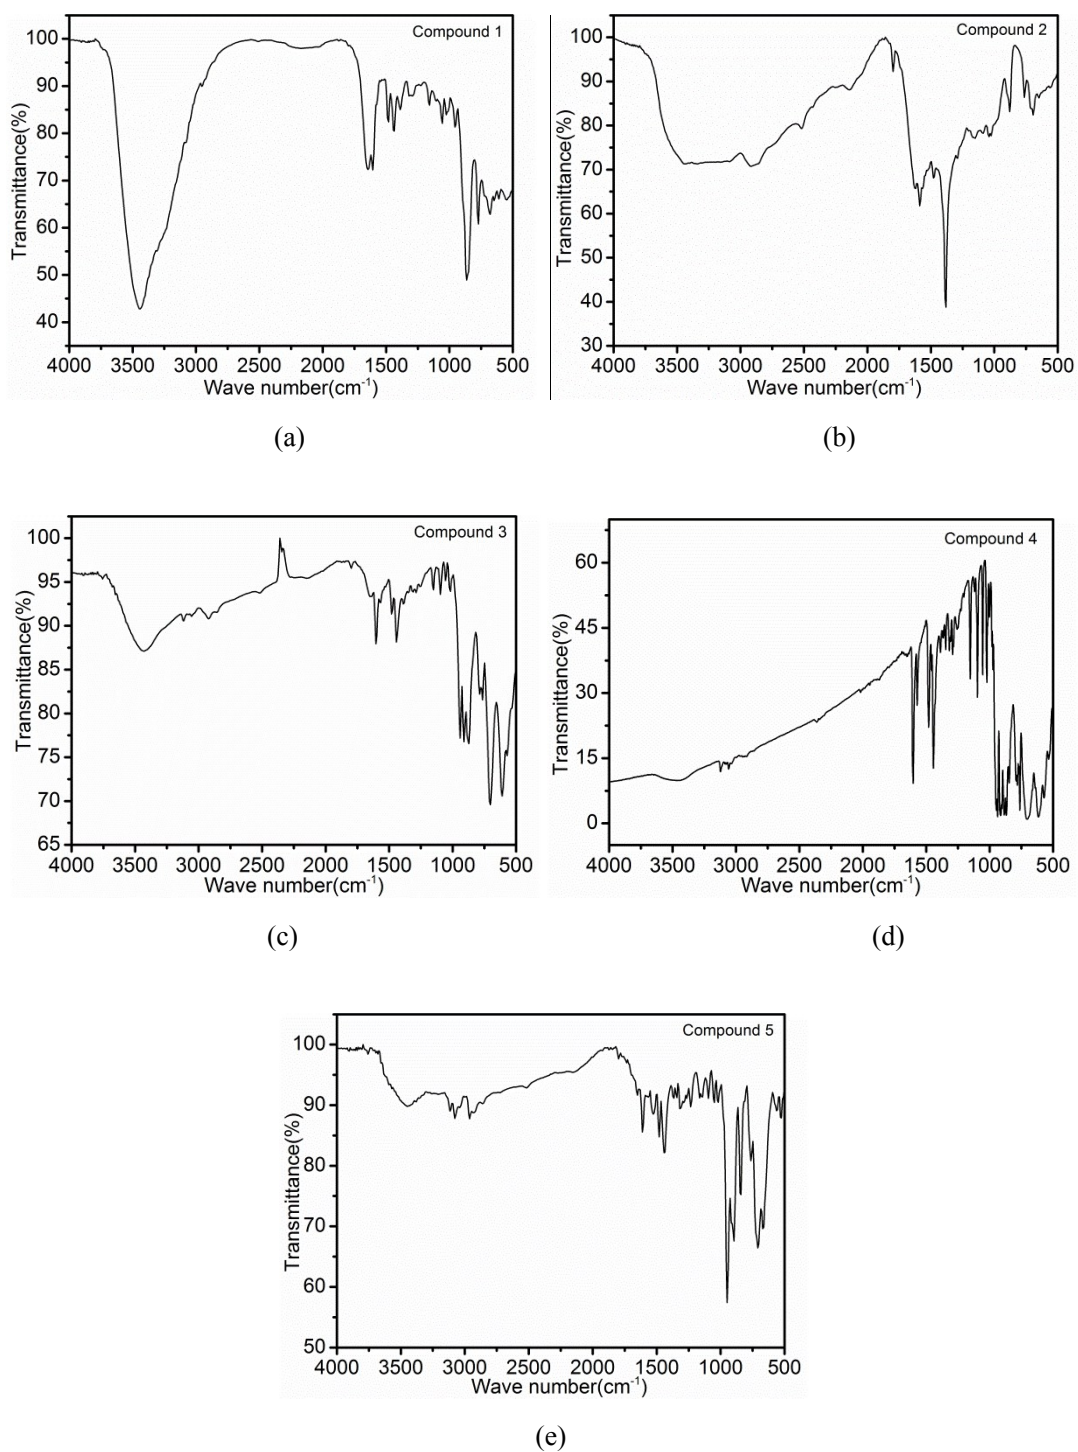

Fig. S1 The IR spectra of compounds 1–5.

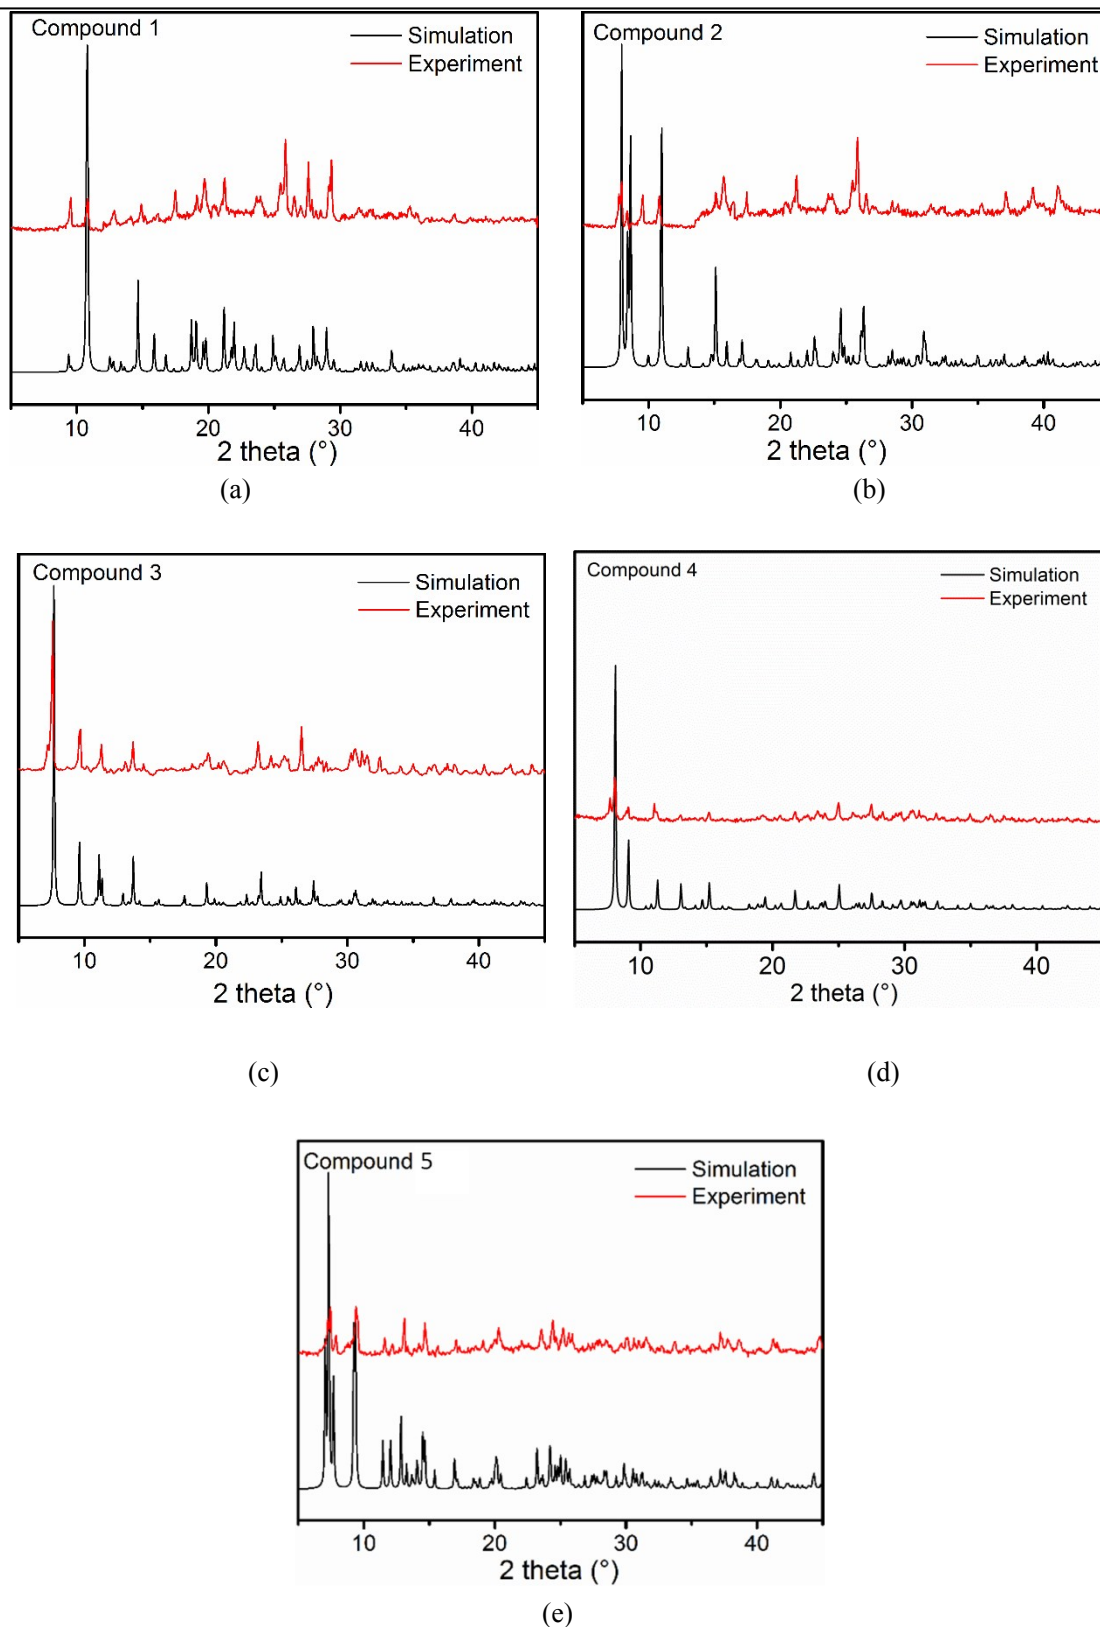

Fig. S2 The powder X-ray diffraction of compounds 1–5.

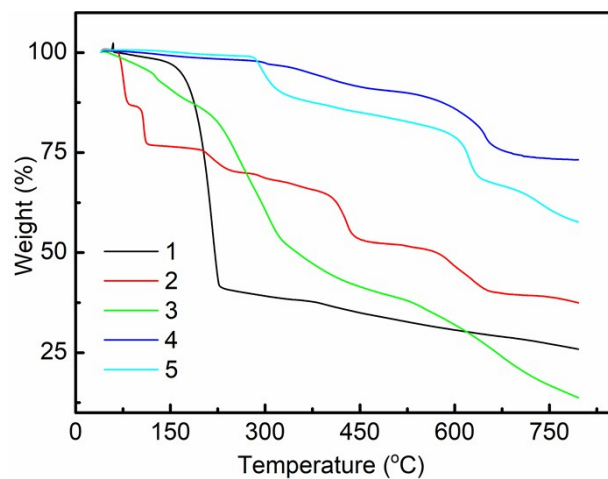

Fig. S3 The TG curves of compounds 1–5.

Table S2 Relationship between structure and property of compounds 1–5.

| Compound          | 1                                                                                   | 2                                                                                   | 3                                                                                   | 4                                                                                    | 5                                                                                    |
|-------------------|-------------------------------------------------------------------------------------|-------------------------------------------------------------------------------------|-------------------------------------------------------------------------------------|--------------------------------------------------------------------------------------|--------------------------------------------------------------------------------------|
| Crystal Structure |  |  |  |  |  |
| Thermal Stability | ✗                                                                                   | ✗                                                                                   | ✗                                                                                   | ✓                                                                                    | ✓                                                                                    |
| Electrocatalytic  | ✗                                                                                   | ✗                                                                                   | ✗                                                                                   | ✗                                                                                    | ✓                                                                                    |
| Photocatalytic    | ✗                                                                                   | ✗                                                                                   | ✗                                                                                   | ✓                                                                                    | ✓                                                                                    |
